# Supplementary material
Source: MDPI journal article supplement (https://www.mdpi.com/1996-1073/17/2/409)
Supplement: s1 [file s1]

---

*Review*

# Challenges Ahead on Sustainable Cities: A Transport and Urban Form Review

Supplemental Materials

---

**Table S1.** List of references with authors, publication date, location of research and topic of research.

| Authors                                                                                          | Publication date | Location of Research | Article topic                                                |
|--------------------------------------------------------------------------------------------------|------------------|----------------------|--------------------------------------------------------------|
| Acker, V.V.; Derudder, B.; Witlox, F.                                                            | 2013             | Flanders, Belgium    | Active mobility                                              |
| Adams, S.; Boateng, E.; Acheampong, A.O.                                                         | 2020             | Sub-Saharan Africa   | Developing countries urban energy challenges                 |
| Aguiléra, A.; Voisin, M.                                                                         | 2014             | Paris, France        | Transport and the built environment                          |
| Ahmad, K.; Khare, M.; Chaudhry, K.                                                               | 2005             | Worldwide            | Street canyons                                               |
| Ahern, J.                                                                                        | 2013             | Unspecified          | Eco-districts and built environment towards clean energy     |
| Akbari, H.; Kolokotsa, D.                                                                        | 2016             | Worldwide            | Urban public spaces                                          |
| Akbari, H.; Matthews, H.D.                                                                       | 2012             | Worldwide            | Urban public spaces                                          |
| Al-Obaidi, K.M.; Hossain, M.; Alduais, N.A.M.; Al-Duais, H.S.; Omrany, H.; Ghaffarianhoseini, A. | 2022             | Unspecified          | Urban geometry, IOT and buildings energy consumption         |
| Alahmad, M.; Hasna, H.; Sordiashie, E.                                                           | 2011             | Unspecified          | Transport and the built environment, vehicle electrification |
| Alcazar, S.S.; Olivieri, F.; Neila, J.                                                           | 2016             | Madrid, Spain        | Urban heat island                                            |
| Alford, G.; Whiteman, J.                                                                         | 2009             | Melbourne, Australia | Transport and the built environment                          |
| Ali-Toudert, F.; Mayer, H.                                                                       | 2007             | Ghardaia, Algeria    | Active mobility                                              |
| Almulhim, A.I.; Bibri, S.E.; Sharifi, A.; Ahmad, S.; Al-matar, K.M.                              | 2022             | Gulf countries       | Developing countries urban energy challenges                 |
| Alshehry, A.S.; Belloumi, M.                                                                     | 2017             | Saudi Arabia         | Developing countries urban energy challenges                 |
| Amado, M.; Poggi, F.; Amado, A.R.                                                                | 2016             | Lisbon, Portugal     | Urban sprawl                                                 |
| Amado, M.; Poggi, F.; Ribeiro Amado, A.; Breu, S.                                                | 2018             | Oeiras, Portugal     | Urban geometry and buildings energy consumption              |
| Anderson, J.E.; Wulforth, G.; Lang, W.                                                           | 2015             | Unspecified          | Urban form and policies                                      |

| Authors                                                                                                                                          | Publication date | Location of Research | Article topic                                            |
|--------------------------------------------------------------------------------------------------------------------------------------------------|------------------|----------------------|----------------------------------------------------------|
| Aram, F.; Higuera García, E.; Solgi, E.; Mansournia, S.                                                                                          | 2019             | Unspecified          | Urban heat island                                        |
| Aram, F.; Solgi, E.; Holden, G.                                                                                                                  | 2019             | Hamadan, Iran        | Urban heat island                                        |
| Artmann, M.; Inostroza, L.; Fan, P.                                                                                                              | 2019             | Unspecified          | Urban sprawl                                             |
| Asarpota, K.; Nadin, V.                                                                                                                          | 2020             | Unspecified          | Urban form                                               |
| Azevedo, J.A.; Chapman, L.; Muller, C.L.                                                                                                         | 2016             | Birmingham, UK       | Urban heat island                                        |
| Bajracharya, A.R.; Shrestha, S.; Skotte, H.                                                                                                      | 2020             | Kathmandu,, Nepal    | Urban public spaces                                      |
| Baruti, M.M.; Johansson, E.; Åstrand, J.                                                                                                         | 2019             | Unspecified          | Urban form                                               |
| Battista, G.; Carnielo, E.; De Lieto Vollaro, R.                                                                                                 | 2016             | Rome, Italy          | Urban heat island                                        |
| Berawi, M.A.; Ibrahim, B.E.; Gunawan; Miraj, P.                                                                                                  | 2019             | Indonesia            | Densification and compactification                       |
| Besir, A.B.; Cuce, E.                                                                                                                            | 2018             | Worldwide            | Urban heat island                                        |
| Bleviss, D.L.                                                                                                                                    | 2021             | Worldwide            | Active mobility                                          |
| Boakye, K.; Bovbjerg, M.; Schuna, J.; Branscum, A.; Mat-Nasir, N.; Bahonar, A.; Barbarash, O.; Yusuf, R.; Lopez-Jaramillo, P.; Seron, P.; et al. | 2023             | Worldwide            | Active mobility                                          |
| Bracco, S.; Delfino, F.; Ferro, G.; Pagnini, L.; Robba, M.; Rossi, M.                                                                            | 2018             | Savona, Italy        | Eco-districts and built environment towards clean energy |
| Brandt, L.; Derby Lewis, A.; Fahey, R.; Scott, L.; Darling, L.; Swanston, C.                                                                     | 2016             | Chicago, USA         | Urban heat island                                        |
| Brown, R.D.; Vanos, J.; Kenny, N.; Lenzholzer, S.                                                                                                | 2015             | Worldwide            | Urban heat island                                        |
| Bucher, D.; Buffat, R.; Froemelt, A.; Raubal, M.                                                                                                 | 2019             | Switzerland          | Active mobility                                          |
| Buyadi, S.N.A.; Mohd, W.M.N.W.; Misni, A.                                                                                                        | 2015             | Selangor, Malaysia   | Urban heat island                                        |

| Authors                                                                                                                                     | Publication date | Location of Research | Article topic                                                       |
|---------------------------------------------------------------------------------------------------------------------------------------------|------------------|----------------------|---------------------------------------------------------------------|
| Buyana, K.; Byarugaba, D.; Sseviiri, H.; Nsangi, G.; Kasaija, P.                                                                            | 2019             | Africa               | Developing countries urban energy challenges                        |
| Byrne, J.; Taminiau, J.; Kurdgelashvili, L.; Kim, K.N.                                                                                      | 2015             | Seoul, South Korea   | Urban geometry and buildings energy consumption                     |
| C40 Cities                                                                                                                                  | 2023             | Worldwide            | Urban form                                                          |
| Cajot, S.; Peter, M.; Bahu, J.-M.; Guignet, F.; Koch, A.; Maréchal, F.                                                                      | 2017             | Switzerland          | Urban form                                                          |
| Cao, X.; Yang, W.                                                                                                                           | 2017             | Guangzhou, China     | Transport and the built environment, urban trips and network design |
| Caputo, P.; Pasetti, G.                                                                                                                     | 2015             | Italy                | Urban form                                                          |
| Carboni, A.; Pirra, M.; Costa, M.; Kalakou, S.                                                                                              | 2022             | Europe               | Active mobility                                                     |
| Carter, J.G.                                                                                                                                | 2018             | England              | Urban public spaces                                                 |
| Castro, L.F.C.; Freitas, B.B.; Carvalho, P.C.M.                                                                                             | 2021             | Unspecified          | Urban form                                                          |
| Cervero, R.; Murakami, J.                                                                                                                   | 2010             | USA                  | Transport and the built environment                                 |
| Charalampopoulos, I.; Tsiros, I.; Chronopoulou-Sereli, A.; Matzarakis, A.                                                                   | 2013             | Athens, Greece       | Urban heat island                                                   |
| Chen, Y.; Hong, T.; Piette, M.A.                                                                                                            | 2017             | San Francisco, USA   | Eco-districts and built environment towards clean energy            |
| Cheng, V., Steemers, K., Montavon, M., Compagnon, R.                                                                                        | 2006             | Worldwide            | Urban geometry and buildings energy consumption                     |
| Chilvers, J.                                                                                                                                | 2008             | UK                   | Urban form                                                          |
| Chow, W.T.L.; Brazel, A.J.                                                                                                                  | 2012             | Phoenix, USA         | Urban heat island                                                   |
| Christiansen, L.B.; Cerin, E.; Badland, H.; Kerr, J.; Davey, R.; Troelsen, J.; van Dyck, D.; Mitáš, J.; Schofield, G.; Sugiyama, T.; et al. | 2016             | Worldwide            | Active mobility                                                     |

| Authors                                                                                                                            | Publication date | Location of Research                        | Article topic                                            |
|------------------------------------------------------------------------------------------------------------------------------------|------------------|---------------------------------------------|----------------------------------------------------------|
| Coaffee, J.; Therrien, M.-C.; Chelleri, L.; Henstra, D.; Aldrich, D.P.; Mitchell, C.L.; Tsenkova, S.; Rigaud, É.; Participants, T. | 2018             | Unspecified                                 | Urban form                                               |
| Collaço, F.M. de A.; Simoes, S.G.; Dias, L.P.; Duic, N.; Seixas, J.; Bermann, C.                                                   | 2019             | São Paulo, Brazil                           | Urban form                                               |
| Collier, M.J.; Nedović-Budić, Z.; Aerts, J.; Connop, S.; Foley, D.; Foley, K.; Newport, D.; McQuaid, S.; Slaev, A.; Verburg, P.    | 2013             | Unspecified                                 | Urban form, urban sprawl and policies                    |
| Conticelli, E.; Proli, S.; Tondelli, S.                                                                                            | 2017             | Italy                                       | Densification and compactification                       |
| COP 27                                                                                                                             | 2022             | Worldwide                                   | Urban energy consumption data                            |
| Cop 27                                                                                                                             | 2022             | Worldwide                                   | Urban energy consumption data                            |
| Costamagna, F.; Lind, R.; Stjernström, O.                                                                                          | 2019             | Umeå, Sweden                                | Urban public spaces                                      |
| Couto, R.; Duarte, F.; Magalhães, A.                                                                                               | 2022             | Unspecified                                 | Urban public spaces                                      |
| Covenant of Mayors                                                                                                                 | 2023             | Europe                                      | Urban form                                               |
| Croce, S.; Vettorato, D.                                                                                                           | 2021             | Unspecified                                 | Eco-districts and built environment towards clean energy |
| Csuzi, I.; Csuzi, B.                                                                                                               | 2017             | Unspecified                                 | Vehicle electrification and the built environment        |
| Daniel, M.; Lemonsu, A.; Viguié, V.                                                                                                | 2018             | Paris, France                               | Urban heat island                                        |
| Das, M.; Das, A.; Momin, S.                                                                                                        | 2022             | India                                       | Urban heat island                                        |
| Davidson, K.; Nguyen, T.M.P.; Beilin, R.; Briggs, J.                                                                               | 2019             | New York City, USA and Melbourne, Australia | Urban form and policies                                  |
| De Lotto, R.; Micciché, C.; Venco, E.M.; Bonaiti, A.; De Napoli, R.                                                                | 2022             | Italy                                       | Eco-districts and built environment towards clean energy |

| Authors                                                                               | Publication date | Location of Research | Article topic                                     |
|---------------------------------------------------------------------------------------|------------------|----------------------|---------------------------------------------------|
| De Pascali, P.; Bagaini, A.                                                           | 2019             | Unspecified          | Urban form                                        |
| Derix, C.                                                                             | 2012             | Unspecified          | Urban form                                        |
| Dias, A.M.; Lopes, M.; Silva, C.                                                      | 2022             | Unspecified          | Active mobility                                   |
| Dias, D.; Pina, N.; Tchepel, O.                                                       | 2019             | Coimbra, Portugal    | Transport and the built environment               |
| Ding, C.; Cao, X.; Wang, Y.                                                           | 2018             | Washington, USA      | Public transport                                  |
| Ding, C.; Lin, Y.; Liu, C.                                                            | 2014             | Washington, USA      | Urban trips and network design                    |
| Ding, C.; Liu, C.; Lin, Y.; Wang, Y.                                                  | 2014             | Maryland, USA        | Transport and the built environment               |
| Ding, C.; Liu, C.; Zhang, Y.; Yang, J.; Wang, Y.                                      | 2017             | Baltimore, USA       | Urban trips and network design                    |
| Ding, G.; Guo, J.; Pueppke, S.G.; Yi, J.; Ou, M.; Ou, W.; Tao, Y.                     | 2022             | CHina                | Transport and the built environment               |
| Dingil, A.E.; Schweizer, J.; Rupi, F.; Stasiskiene, Z.                                | 2019             | Worldwide            | Transport and the built environment               |
| Dirksen, M.; Ronda, R.; Theeuwes, N.; Pagani, G.                                      | 2019             | Unspecified          | Street canyons                                    |
| Duarte, F.; Ferreira, A.                                                              | 2016             | Unspecified          | Urban public spaces                               |
| Duarte, F.; Ferreira, A.; Fael, P.                                                    | 2018             | Unspecified          | Urban public spaces                               |
| Dupras, J.; Marull, J.; Parcerisas, L.; Coll, F.; Gonzalez, A.; Girard, M.; Tello, E. | 2016             | Montreal, Canada     | Urban sprawl                                      |
| Dydkowski, G.                                                                         | 2020             | Poland               | Transport and the built environment               |
| Eicker, U.; Monien, D.; Dumnil, É.; Nouvel, R.                                        | 2015             | Munich, Germany      | Densification and compactification                |
| Eldeeb, G.; Mohamed, M.; Pérez, A.                                                    | 2021             | Hamilton, Canada     | Transport and the built environment               |
| Energy Information Administration                                                     | 2023             | USA                  | Urban energy consumption data                     |
| Engelfriet, L.; Koomen, E.                                                            | 2018             | China                | Transport and the built environment               |
| European Comission                                                                    | 2022             | Europe               | Vehicle electrification and the built environment |
| Ewing, R.                                                                             | 1997             | Los Angeles, USA     | Transport and the built environment               |

| Authors                                                                                       | Publication date | Location of Research   | Article topic                                                |
|-----------------------------------------------------------------------------------------------|------------------|------------------------|--------------------------------------------------------------|
| Ewing, R.; Handy, S.; Brownson, R.C.; Clemente, O.; Winston, E.                               | 2006             | Unspecified            | Active mobility                                              |
| Falahatkar, S.; Rezaei, F.                                                                    | 2020             | Iran                   | Densification and compactification                           |
| Farhadi, H.; Faizi, M.; Sanaieian, H.                                                         | 2019             | Tehran, Iran           | Urban heat island                                            |
| Fernández-Rodríguez, A.; Fernández-Cardador, A.; Cucala, A.P.; Falvo, M.C.                    | 2019             | Italy and Spain        | Transport and the built environment, vehicle electrification |
| Ferrari, S.; Zagarella, F.; Caputo, P.; Bonomolo, M.                                          | 2019             | Unspecified            | Urban form                                                   |
| Ferreira, H.; Rodrigues, C.M.; Pinho, C.                                                      | 2020             | Porto, Portugal        | Urban trips and network design                               |
| Formolli, M.; Lobaccaro, G.; Kanters, J.                                                      | 2021             | Europe                 | Eco-districts and built environment towards clean energy     |
| Fremouw, M.; Bagaini, A.; De Pascali, P.                                                      | 2020             | Unspecified            | Urban form                                                   |
| Frumkin, H.                                                                                   | 2002             | Unspecified            | Urban sprawl                                                 |
| Fu, J.; Wang, Y.; Zhou, D.; Cao, S.-J.                                                        | 2022             | Xi'na, China           | Urban heat island                                            |
| Fujii, H.; Iwata, K.; Managi, S.                                                              | 2017             | Worldwide              | Urban sprawl, The D-variables of compact planning            |
| Gago, E.J.; Roldan, J.; Pacheco-Torres, R.; Ordóñez, J.                                       | 2013             | Unspecified            | Urban heat island                                            |
| Gattuso, D.; Cassone, G.C.; Malara, M.                                                        | 2018             | Reggio Calabria, Italy | Transport and the built environment                          |
| Gebel, K.; Bauman, A.E.; Sugiyama, T.; Owen, N.                                               | 2011             | Australia              | Active mobility                                              |
| Geertman, S.; Stillwell, J.                                                                   | 2004             | Unspecified            | Urban form                                                   |
| Georgakis, Ch.; Santamouris, M.                                                               | 2006             | Athens, Greece         | Street canyons                                               |
| GhaffarianHoseini, A.; Tookey, J.; GhaffarianHoseini, A.; Naismith, N.; Bamidele Rotimi, J.O. | 2016             | Africa                 | Developing countries urban energy challenges                 |
| Giannopoulou, K.; Santamouris, M.; Livada, I.; Georgakis, C.; Caouris, Y.                     | 2010             | Athens, Greece         | Active mobility                                              |

| Authors                                                                             | Publication date | Location of Research    | Article topic                                     |
|-------------------------------------------------------------------------------------|------------------|-------------------------|---------------------------------------------------|
| Gil-García, I.C.; García-Cascales, M.S.; Molina-García, A.                          | 2022             | Unspecified             | Urban geometry and buildings energy consumption   |
| Giménez-Gaydou, D.A.; Cupido dos Santos, A.; Mendes, G.; Frade, I.; Ribeiro, A.S.N. | 2019             | Coimbra, Portugal       | Active mobility                                   |
| Glaeser, E.L.; Kahn, M.E.                                                           | 2010             | USA                     | Urban sprawl                                      |
| Gonçalves Duarte Santos, G.; Birolini, S.; Homem de Almeida Correia, G.             | 2023             | Portugal                | Vehicle electrification and the built environment |
| Gough, M.; Lotfi, M.; Castro, R.; Madhlopa, A.; Khan, A.; Catalão, J.P.S.           | 2019             | Cape Town, South Africa | Urban geometry and buildings energy consumption   |
| Gunawardena, K.R.; Wells, M.J.; Kershaw, T.                                         | 2017             | Unspecified             | Urban heat island                                 |
| Guo, J.; Bissuel, C.; Courtot, F.                                                   | 2021             | China                   | Urban form                                        |
| Gyurov, V.; Bezhanov, N.                                                            | 2019             | Varna, Bulgaria         | Vehicle electrification and the built environment |
| Hamstead, Z.A.; Farmer, C.; McPhearson, T.                                          | 2018             | USA                     | Urban heat island                                 |
| Handy, S.L.; Boarnet, M.G.; Ewing, R.; Killingsworth, R.E.                          | 2002             | Florida, USA            | Active mobility                                   |
| Hankey, S.; Marshall, J.D.                                                          | 2010             | USA                     | Transport and the built environment               |
| Hannan, S.; Sutherland, C.                                                          | 2015             | Durban, South Africa    | Developing countries urban energy challenges      |
| Harlan, S.L.; Brazel, A.J.; Prashad, L.; Stefanov, W.L.; Larsen, L.                 | 2006             | Phoenix, USA            | Urban heat island                                 |
| Heres-Del-Valle, D.; Niemeier, D.                                                   | 2011             | California, USA         | Urban trips and network design                    |
| Hickman, R.; Banister, D.                                                           | 2014             | Unspecified             | Transport and the built environment               |
| Hong, J.; Goodchild, A.                                                             | 2014             | Unspecified             | Urban sprawl                                      |
| Howard, E.                                                                          | 2010             | Unspecified             | Urban sprawl                                      |



| Authors                                                                     | Publication date | Location of Research    | Article topic                                                |
|-----------------------------------------------------------------------------|------------------|-------------------------|--------------------------------------------------------------|
| Hsieh, S.; Schüler, N.; Shi, Z.; Fonseca, J.A.; Maréchal, F.; Schlueter, A. | 2017             | Singapore               | Urban sprawl                                                 |
| Hu, J.; Yu, X.B.                                                            | 2019             | USA                     | Urban public spaces                                          |
| Huang, C.; Yang, J.; Jiang, P.                                              | 2018             | China                   | Urban heat island                                            |
| Huang, H.; Li, Q.; Yang, Y.; Zhang, L.; Dong, Z.                            | 2022             | China                   | Urban form                                                   |
| Huchzermeyer, M.                                                            | Not specified    | Worldwide               | Developing countries urban energy challenges                 |
| Hukkalainen, M.; Virtanen, M.; Paiho, S.; Airaksinen, M.                    | 2017             | Finland                 | Urban form                                                   |
| ICLEI Europe                                                                | 2023             | Europe                  | Urban form                                                   |
| IEA                                                                         | 2023             | Worldwide               | Vehicle electrification and the built environment            |
| International Energy Agency                                                 | 2022             | Worldwide               | Urban energy consumption data                                |
| International Energy Agency                                                 | 2023             | Worldwide               | Transport and the built environment, vehicle electrification |
| Jacobs, J.                                                                  | 1992             | USA                     | Urban form, urban sprawl                                     |
| Jank, R.                                                                    | 2017             | Europe                  | Urban form and policies                                      |
| Jha, A.; Preonas, L.; Burlig, F.                                            | 2021             | India                   | Urban energy consumption data                                |
| Jin, J.                                                                     | 2019             | Chicago, USA            | Urban sprawl                                                 |
| Johansson, E.                                                               | 2006             | Fez, Morocco            | Active mobility                                              |
| Johansson, E.; Spangenberg, J.; Gouvêa, M.L.; Freitas, E.D.                 | 2013             | São Paulo, Brazil       | Active mobility                                              |
| John, R.                                                                    | 2020             | Dar Es Salaam, Tanzania | Developing countries urban energy challenges                 |
| Juvara, M.                                                                  | 2022             | Worldwide               | Urban energy consumption data                                |

| Authors                                                                                                              | Publication date | Location of Research | Article topic                                            |
|----------------------------------------------------------------------------------------------------------------------|------------------|----------------------|----------------------------------------------------------|
| Kadaverugu, A.; Kadaverugu, R.; Chintala, N.R.; Gorthi, K.V.                                                         | 2021             | Hyderabad, India     | Urban heat island                                        |
| Kakar, K.A.; Prasad, C.S.R.K.                                                                                        | 2020             | Kabul, Afghanistan   | Urban sprawl                                             |
| Karan, E.; Mohammadpour, A.; Asadi, S.                                                                               | 2016             | Unspecified          | Vehicle electrification and the built environment        |
| Kastner-Klein, P.; Berkowicz, R.; Britter, R.                                                                        | 2004             | Unspecified          | Street canyons                                           |
| Kaza, N.                                                                                                             | 2020             | USA                  | Densification and compactification                       |
| Keirstead, J.; Jennings, M.; Sivakumar, A.                                                                           | 2012             | Unspecified          | Urban geometry and buildings energy consumption          |
| Kenworthy, J.R.                                                                                                      | 2006             | Worldwide            | Eco-districts and built environment towards clean energy |
| Kenworthy, J.R.; Laube, F.B.                                                                                         | 1996             | Worldwide            | Transport and the built environment                      |
| Kim, K.; Yi, C.; Lee, S.                                                                                             | 2019             | Seoul, South Korea   | Urban heat island                                        |
| Kiprop, V.                                                                                                           | 2017             | Unspecified          | Street canyons                                           |
| Klemm, W.; Heusinkveld, B.G.; Lenzholzer, S.; van Hove, B.                                                           | 2015             | Utrecht, Netherlands | Urban heat island                                        |
| Kosai, S.; Yuasa, M.; Yamasue, E.                                                                                    | 2020             | Japan                | Urban trips and network design                           |
| Koutra, S.; Becue, V.; Gallas, M.-A.; Ioakimidis, C.S.                                                               | 2018             | Unspecified          | Eco-districts and built environment towards clean energy |
| Kumar, P.; Morawska, L.; Martani, C.; Biskos, G.; Neophytou, M.; Di Sabatino, S.; Bell, M.; Norford, L.; Britter, R. | 2015             | Unspecified          | Street canyons                                           |
| Lai, D.; Liu, W.; Gan, T.; Liu, K.; Chen, Q.                                                                         | 2019             | Unspecified          | Urban geometry and buildings energy consumption          |
| Lawrence, D.P.                                                                                                       | 2000             | Unspecified          | Urban form                                               |
| Le Corbusier                                                                                                         | 1972             | Unspecified          | Urban sprawl                                             |

| Authors                                                                                                              | Publication date | Location of Research                | Article topic                                            |
|----------------------------------------------------------------------------------------------------------------------|------------------|-------------------------------------|----------------------------------------------------------|
| Lee, J.H.; Lim, S.                                                                                                   | 2018             | South Korea                         | Densification and compactification                       |
| Leichenko, R.                                                                                                        | 2011             | Unspecified                         | Urban form                                               |
| Li, H.; Harvey, J.; Kendall, A.                                                                                      | 2013             | California, USA                     | Urban heat island                                        |
| Li, S.; Zhao, P.                                                                                                     | 2017             | Beijing                             | Urban trips and network design, public transport         |
| Li, Y.; Schubert, S.; Kropp, J.; Rybski, D.                                                                          | 2020             | Worldwide                           | Street canyons                                           |
| Li, X.-X.; Liu, C.-H.; Leung, D.Y.C.; Lam, K.M.                                                                      | 2006             | Unspecified                         | Street canyons                                           |
| Li, X.; Zhou, W.; Ouyang, Z.                                                                                         | 2013             | Beijing, China                      | Urban heat island                                        |
| Li, Z.; Quan, S.J.; Yang, P.P.-J.                                                                                    | 2016             | Macau                               | Urban geometry and buildings energy consumption          |
| Lim, X.                                                                                                              | 2019             | Unspecified                         | Urban public spaces                                      |
| Lin, L.; Moudon, A.V.                                                                                                | 2010             | Unspecified                         | Active mobility                                          |
| Litman, T.                                                                                                           | 2005             | Worldwide                           | Transport and the built environment                      |
| Liu, C.; Leung, D.; Barth, M.                                                                                        | 2005             | Worldwide                           | Street canyons                                           |
| Liu, X.; Huang, B.; Li, R.; Wang, J.                                                                                 | 2021             | Shenzhen, China                     | Urban form and policies                                  |
| Liu, X.; Sweeney, J.                                                                                                 | 2012             | Dublin, Ireland                     | Transport and the built environment                      |
| Liu, Y.; Huang, L.; Onstein, E.                                                                                      | 2020             | Norway                              | Transport and the built environment                      |
| Lobaccaro, G.; Acero, J.A.                                                                                           | 2015             | Bilbao, Spain                       | Urban heat island                                        |
| Lobaccaro, G.; Croce, S.; Lindkvist, C.; Munari Probst, M.C.; Scognamiglio, A.; Dahlberg, J.; Lundgren, M.; Wall, M. | 2019             | Worldwide                           | Eco-districts and built environment towards clean energy |
| Loeffler, R.; Österreicher, D.; Stoeglehner, G.                                                                      | 2021             | Vienna, Austria                     | Densification and compactification                       |
| Lombardi, P.; Trossero, E.                                                                                           | 2013             | Europe                              | Eco-districts and built environment towards clean energy |
| Lu, I.J.; Lin, S.J.; Lewis, C.                                                                                       | 2007             | Taiwan, Germany, Japan, South Korea | Transport and the built environment                      |

| Authors                                                                         | Publication date | Location of Research   | Article topic                                            |
|---------------------------------------------------------------------------------|------------------|------------------------|----------------------------------------------------------|
| Luqman, M.; Rayner, P.J.; Gurney, K.R.                                          | 2023             | Worldwide              | Densification and compactification                       |
| Lyu, G.; Bertolini, L.; Pfeffer, K.                                             | 2016             | Beijing, China         | Densification and compactification                       |
| Ma, L.; Dill, J.                                                                | 2015             | Portland, USA          | Active mobility                                          |
| Ma, Y.; Yang, Y.; Jiao, H.                                                      | 2021             | Wuhan, China           | Urban form                                               |
| Mackey, C.W.; Lee, X.; Smith, R.B.                                              | 2012             | Chicago, USA           | Urban heat island                                        |
| Mandeli, K.                                                                     | 2019             | Jeddah, Saudi Arabia   | Urban public spaces                                      |
| Marciotto, E.; Oliveira, A.; Hanna, S.                                          | 2010             | Worldwide              | Street canyons                                           |
| Marrone, P.; Fiume, F.; Laudani, A.; Montella, I.; Palermo, M.; Fulginei, F.R.  | 2023             | Rome, Italy            | Eco-districts and built environment towards clean energy |
| Mastrucci, A.; Baume, O.; Stazi, F.; Leopold, U.                                | 2014             | Rotterdam, Netherlands | Eco-districts and built environment towards clean energy |
| Matzarakis, A.; Rutz, F.; Mayer, H.                                             | 2007             | Crete, Greece          | Active mobility                                          |
| Maya-Drysdale, D.; Krog Jensen, L.; Vad Mathiesen, B.                           | 2020             | Europe                 | Urban form                                               |
| McPherson, E.G.; Simpson, J.R.; Peper, P.J.; Maco, S.E.; Xiao, Q.; Hoefer, P.J. | 2003             | Unspecified            | Urban heat island                                        |
| Mele, C.; McLeskey, M.H.                                                        | 2018             | Unspecified            | Urban form and policies                                  |
| Mendiola, L.; González, P.; Cebollada, À.                                       | 2014             | Biscay                 | Urban trips and network design                           |
| Meng, T.; Hsu, D.; Han, A.                                                      | 2017             | New York, USA          | Eco-districts and built environment towards clean energy |
| Mohsin, M.M.; Beach, T.; Kwan, A.                                               | 2017             | Bristol, UK            | Developing countries urban energy challenges             |

| Authors                                                                                                  | Publication date | Location of Research                         | Article topic                                                                         |
|----------------------------------------------------------------------------------------------------------|------------------|----------------------------------------------|---------------------------------------------------------------------------------------|
| Monteiro, J.; Carrilho, A.C.; Sousa, N.; Oliveira, L.K. de; Natividade-Jesus, E.; Coutinho-Rodrigues, J. | 2023             | Belo Horizonte, Brazil and Coimbra, Portugal | Urban form                                                                            |
| Monteiro, J.; Para, M.; Sousa, N.; Natividade-Jesus, E.; Ostorero, C.; Coutinho-Rodrigues, J.            | 2023             | Coimbra, Portugal                            | Transport and the built environment, urban sprawl, densification and compactification |
| Monteiro, J.; Sousa, N.; Natividade-Jesus, E.; Coutinho-Rodrigues, J.                                    | 2023             | Coimbra, Portugal                            | Transport and the built environment, urban sprawl                                     |
| Monteiro, J.; Sousa, N.; Natividade-Jesus, E.; Coutinho-Rodrigues, J.                                    | 2023             | Coimbra, Portugal                            | Active mobility, urban sprawl                                                         |
| Monteiro, J.; Sousa, N.; Natividade-Jesus, E.; Coutinho-Rodrigues, J.                                    | 2022             | Coimbra, Portugal                            | Urban form, urban sprawl                                                              |
| Monteiro, J.; Sousa, N.; Pais, F.; Coutinho-Rodrigues, J.; Natividade-Jesus, E.                          | 2023             | Worldwide                                    | Urban form                                                                            |
| Moraci, F.; Errigo, M.F.; Fazia, C.; Burgio, G.; Foresta, S.                                             | 2018             | Rotterdam, Netherlands                       | Urban form                                                                            |
| Morrissey, J.; Moore, T.; Horne, R.E.                                                                    | 2011             | Unspecified                                  | Urban geometry and buildings energy consumption, street canyons                       |
| Motavalli, J.                                                                                            | 2021             | Unspecified                                  | Vehicle electrification and the built environment, urban form                         |
| Moyer, A.N.; Hawkins, T.W.                                                                               | 2017             | Pennsylvania, USA                            | Urban heat island                                                                     |
| Muñoz, P.; Zwick, S.; Mirzabaei, A.                                                                      | 2020             | Austria                                      | Densification and compactification                                                    |
| Naess, P.                                                                                                | 2010             | Hangzhou, China                              | Urban sprawl                                                                          |
| Nahlik, M.J.; Chester, M.V.                                                                              | 2014             | Los Angeles, USA                             | Transport and the built environment, densification and compactification               |

| Authors                                                                                  | Publication date | Location of Research           | Article topic                                                           |
|------------------------------------------------------------------------------------------|------------------|--------------------------------|-------------------------------------------------------------------------|
| Nasri, A.; Zhang, L.                                                                     | 2014             | Washington, D.C. and Baltimore | Transport and the built environment, densification and compactification |
| Natividade-Jesus, E.                                                                     | 2022             | Unspecified                    | Transport and the built environment                                     |
| Nelson, A.C.                                                                             | 2017             | Unspecified                    | Urban sprawl, The D-variables of compact planning                       |
| Net Zero by 2050                                                                         | 2021             | Worldwide                      | Eco-districts and built environment towards clean energy                |
| Neuman, M.                                                                               | 2005             | Unspecified                    | The D-variables of compact planning                                     |
| Newman, P.                                                                               | 2006             | Worldwide                      | Transport and the built environment                                     |
| Newman, P.W.G.; Kenworthy, J.R.                                                          | 1989             | Worldwide                      | Transport and the built environment                                     |
| Nkosi, N.P.; Dikgang, J.;                                                                | 2018             | South Africa                   | Urban energy consumption data                                           |
| Norton, B.A.; Coutts, A.M.; Livesley, S.J.; Harris, R.J.; Hunter, A.M.; Williams, N.S.G. | 2015             | Melbourne, Australia           | Urban heat island                                                       |
| O'Malley, C.; Piroozfar, P.; Farr, E.R.P.; Pomponi, F.                                   | 2015             | London, UK                     | Urban heat island                                                       |
| Oh, M.; Jang, K.M.; Kim, Y.                                                              | 2021             | Seoul, South Korea             | Urban geometry and buildings energy consumption, street canyons         |
| Oh, M.; Kim, Y.                                                                          | 2019             | South Korea                    | Urban geometry and buildings energy consumption                         |
| Oke, T.                                                                                  | 1987             | Unspecified                    | Urban heat island                                                       |
| Oke, T.                                                                                  | 1981             | Unspecified                    | Street canyons                                                          |
| Okeil, A.                                                                                | 2010             | Unspecified                    | Urban heat island                                                       |
| Olgyay, V.                                                                               | 2015             | Unspecified                    | Urban geometry and buildings energy consumption                         |
| Osman, T.; Divigalpitiya, P.; Osman, M.M.                                                | 2016             | Cairo, Egypt                   | Urban sprawl                                                            |
| Ozgun, K.                                                                                | 2020             | Sidney, Australia              | Urban public spaces                                                     |
| Paatero, J.V.; Lund, P.D.                                                                | 2007             | Helsinki, Finland              | Eco-districts and built environment towards clean energy                |

| Authors                                                                                | Publication date | Location of Research    | Article topic                                            |
|----------------------------------------------------------------------------------------|------------------|-------------------------|----------------------------------------------------------|
| Pacheco-Torgal, F.                                                                     | 2015             | Worldwide               | Urban heat island                                        |
| Pasichnyi, O.; Levihn, F.; Shahrokni, H.; Wallin, J.; Kordas, O.                       | 2019             | Stockholm, Sweeden      | Eco-districts and built environment towards clean energy |
| Patel, Z.; Greyling, S.; Simon, D.; Arfvidsson, H.; Moodley, N.; Primo, N.; Wright, C. | 2017             | Cape Town, South Africa | Developing countries urban energy challenges             |
| Pei, A.                                                                                | 2023             | Worldwide               | Active mobility                                          |
| Perea-Moreno, M.-A.; Hernandez-Escobedo, Q.; Perea-Moreno, A.-J.                       | 2018             | Worldwide               | Urban form                                               |
| Perini, K.; Magliocco, A.                                                              | 2014             | Italy                   | Active mobility                                          |
| Petersen, J.-P.; Heurkens, E.                                                          | 2018             | Europe                  | Urban form                                               |
| Pieterse, D.E.; Parnell, S.                                                            | Not specified    | Africa                  | Developing countries urban energy challenges             |
| Pietrzak, O.; Pietrzak, K.                                                             | 2021             | Szczecin, Poland        | Vehicle electrification and the built environment        |
| Pisano, C.                                                                             | 2020             | Italy and Spain         | Active mobility                                          |
| Pisello, A.L.                                                                          | 2017             | Unspecified             | Urban public spaces                                      |
| Pisello, A.L.; Taylor, J.E.; Xu, X.; Cotana, F.                                        | 2012             | USA                     | Densification and compactification                       |
| Pizzo, B.                                                                              | 2015             | Unspecified             | Urban form                                               |
| Pretty, J.; Toulmin, C.; Williams, S.                                                  | 2011             | Africa                  | Developing countries urban energy challenges             |
| Priyadarsini, R.; Hien, W.N.; Wai David, C.K.                                          | 2008             | Singapore               | Densification and compactification                       |
| Qin, Y.                                                                                | 2015             | California, USA         | Urban public spaces                                      |
| Quan, S.J.; Li, C.                                                                     | 2021             | Unspecified             | Urban form                                               |
| Redweik, P.; Catita, C.; Brito, M.                                                     | 2013             | Lisbon, Portugal        | Urban geometry and buildings energy consumption          |
| Regina de Casas Castro Marins, K.                                                      | 2014             | São Paulo, Brazil       | Public transport                                         |

| Authors                                                                   | Publication date | Location of Research | Article topic                                                       |
|---------------------------------------------------------------------------|------------------|----------------------|---------------------------------------------------------------------|
| Reinhart, C.F.; Cerezo Davila, C.                                         | 2016             | Worldwide            | Urban form                                                          |
| Resch, E.; Bohne, R.A.; Kvamsdal, T.; Lohne, J.                           | 2016             | Europe               | Densification and compactification                                  |
| Rickwood, P.; Glazebrook, G.; Searle, G.                                  | 2008             | Unspecified          | Urban form                                                          |
| Riley, C.                                                                 | 2019             | Unspecified          | Vehicle electrification                                             |
| Rodríguez-Álvarez, J.                                                     | 2016             | Europe               | Densification and compactification                                  |
| Roger-Lacan, C.                                                           | 2019             | Unspecified          | Eco-districts and built environment towards clean energy            |
| Rosso, F.; Fabiani, C.; Chiatti, C.; Pisello, A.L.                        | 2019             | Unspecified          | Urban public spaces                                                 |
| Rosso, F.; Pisello, A.L.; Cotana, F.; Ferrero, M.                         | 2016             | Italy                | Urban public spaces                                                 |
| Rydin, Y.; Thomas, S.; Beddington, J.                                     | 2010             | UK                   | Urban form                                                          |
| Santamouris, M.                                                           | 2013             | Unspecified          | Urban heat island                                                   |
| Santamouris, M.                                                           | 2014             | Unspecified          | Urban heat island                                                   |
| Santos, P.                                                                | -                | Unspecified          | Buildings and materials                                             |
| Santos, T.; Deus, R.; Rocha, J.; Tenedório, J.A.                          | 2021             | Algarve, Portugal    | The D-variables of compact planning                                 |
| Sarrat, C.; Lemonsu, A.; Masson, V.; Guedalia, D.                         | 2006             | Paris, France        | Urban heat island                                                   |
| Shahidan, Mohd.F.; Shariff, M.K.M.; Jones, P.; Salleh, E.; Abdullah, A.M. | 2010             | Malaysia             | Urban heat island                                                   |
| Shashua-Bar, L.; Hoffman, M.E.                                            | 2000             | Tel-Aviv, Israel     | Active mobility                                                     |
| Shashua-Bar, L.; Potchter, O.; Bitan, A.; Boltansky, D.; Yaakov, Y.       | 2010             | Tel Aviv, Israel     | Urban heat island                                                   |
| Shen, Q.; Chen, P.; Pan, H.                                               | 2016             | China                | Public transport                                                    |
| Shi, F.; Liao, X.; Shen, L.; Meng, C.; Lai, Y.                            | 2022             | China                | Transport and the built environment                                 |
| Shim, G.-E.; Rhee, S.-M.; Ahn, K.-H.; Chung, S.-B.                        | 2006             | South Korea          | Transport and the built environment, urban trips and network design |
| Shirgaokar, M.; Deakin, E.; Duduta, N.                                    | 2013             | Jinan, China         | Urban geometry and buildings energy consumption                     |



| Authors                                                               | Publication date | Location of Research | Article topic                                                   |
|-----------------------------------------------------------------------|------------------|----------------------|-----------------------------------------------------------------|
| Silva, M.; Leal, V.; Oliveira, V.; Horta, I.M.                        | 2018             | Porto, Portugal      | Densification and compactification                              |
| Silva, M.; Oliveira, V.; Leal, V.                                     | 2017             | Porto, Portugal      | Transport and the built environment                             |
| Silva, M.C.; Horta, I.M.; Leal, V.; Oliveira, V.                      | 2017             | Porto, Portugal      | Urban geometry and buildings energy consumption                 |
| Sousa, N.; Almeida, A.; Coutinho-Rodrigues, J.                        | 2020             | Europe               | Vehicle electrification and the built environment               |
| Sousa, N.; Monteiro, J.; Natividade-Jesus, E.; Coutinho-Rodrigues, J. | 2022             | Coimbra, Portugal    | Urban sprawl                                                    |
| Sousa, N.; Monteiro, J.; Natividade-Jesus, E.; Coutinho-Rodrigues, J. | 2022             | Coimbra, Portugal    | The D-variables of compact planning                             |
| Srivanit, M.; Hokao, K.                                               | 2013             | Japan                | Active mobility                                                 |
| Starace, F.; Tricoire, J.-P.                                          | 2021             | Worldwide            | Urban energy consumption data                                   |
| Stemers, K.                                                           | 2003             | Worldwide            | Densification and compactification                              |
| Stelzer, V.; Immendoerfer, A.; Winkelmann, M.                         | 2014             | Europe               | Urban form and policies                                         |
| Stevens, M.R.                                                         | 2017             | Unspecified          | Urban sprawl, The D-variables of compact planning               |
| Stone, B.; Mednick, A.C.; Holloway, T.; Spak, S.N.                    | 2007             | USA                  | Urban sprawl                                                    |
| Strasser, H.                                                          | 2015             | Salzburg, Austria    | Urban form and policies                                         |
| Strømman-Andersen, J.; Sattrup, P.A.                                  | 2011             | Copenhagen, Denmark  | Urban geometry and buildings energy consumption, street canyons |
| Swilling, M.; Anneck, E.                                              | 2006             | South Africa         | Developing countries urban energy challenges                    |
| Talbi, B.                                                             | 2017             | Tunisia              | Developing countries urban energy challenges                    |
| Taleghani, M.; Tenpierik, M.; van den Dobbelsteen, A.; de Dear, R.    | 2013             | Netherlands          | Urban geometry and buildings energy consumption, street canyons |
| Taminiau, J.; Byrne, J.; Kim, J.; Kim, M.; Seo, J.                    | 2021             | East Asia            | Eco-districts and built environment towards clean energy        |

| Authors                                                                                                         | Publication date | Location of Research | Article topic                                   |
|-----------------------------------------------------------------------------------------------------------------|------------------|----------------------|-------------------------------------------------|
| Tchepel, O.; Monteiro, A.; Dias, D.; Gama, C.; Pina, N.; Rodrigues, J.P.; Ferreira, M.; Miranda, A.I.           | 2020             | Coimbra, Portugal    | Urban geometry and buildings energy consumption |
| Toboso-Chavero, S.; Nadal, A.; Petit-Boix, A.; Pons, O.; Villalba, G.; Gabarrell, X.; Josa, A.; Rieradevall, J. | 2019             | Unspecified          | Urban form                                      |
| Todhunter, P.                                                                                                   | 1990             | Worldwide            | Street canyons                                  |
| Tsangas, M.; Papamichael, I.; Zorpas, A.A.                                                                      | 2023             | Unspecified          | Urban form                                      |
| U.S. Department of Transportation                                                                               | 2010             | United States        | Active mobility                                 |
| UN Habitat                                                                                                      | 2023             | Worldwide            | Urban energy consumption data                   |
| United Nations                                                                                                  | 2018             | Worldwide            | Urban energy consumption data                   |
| United Nations                                                                                                  | 2023             | Worldwide            | Urban energy consumption data                   |
| United Nations                                                                                                  | 2021             | Worldwide            | Urban energy consumption data                   |
| Urban Sprawl in Europe - Joint EEA-FOEN Report                                                                  | N/A              | Europe               | Urban sprawl                                    |
| Vailshery, L.S.; Jaganmohan, M.; Nagendra, H.                                                                   | 2013             | Bangalore, India     | Active mobility                                 |
| Van der Borcht, R.; Pallares Barbera, M.                                                                        | 2023             | Latin America        | Transport and the built environment             |
| van Esch, M.M.E.; Looman, R.H.J.; de Bruin-Hordijk, G.J.                                                        | 2012             | Netherlands          | Street canyons                                  |
| Vardoulakis, S.; Fisher, B.E.A.; Pericleous, K.; Gonzalez-Flesca, N.                                            | 2003             | Unspecified          | Street canyons                                  |
| Vartholomaïos, A.                                                                                               | 2017             | Thessaloniki, Greece | Urban geometry and buildings energy consumption |
| Vonk, G.; Ligtenberg, A.                                                                                        | 2010             | Unspecified          | Urban form                                      |
| Wang, D.; Zhou, M.                                                                                              | 2017             | China                | Urban sprawl                                    |
| Wang, H.; Ou, X.; Zhang, X.                                                                                     | 2017             | China                | Developing countries urban energy challenges    |

| Authors                                                                               | Publication date | Location of Research   | Article topic                                                            |
|---------------------------------------------------------------------------------------|------------------|------------------------|--------------------------------------------------------------------------|
| Wang, P.; Yang, Y.; Ji, C.; Huang, L.                                                 | 2023             | Nanjing, China         | Urban heat island                                                        |
| Wang, S.; Lu, C.; Liu, C.; Zhou, Y.; Bi, J.; Zhao, X.                                 | 2020             | China                  | Vehicle electrification and the built environment                        |
| Wang, S.; Wang, J.; Fang, C.; Li, S.                                                  | 2019             | China                  | Densification and compactification                                       |
| Wang, Y.; Yang, L.; Han, S.; Li, C.; Ramachandra, T.V.                                | 2017             | Xi'an and Bangalore    | Urban trips and network design                                           |
| Wang, Z.-H.                                                                           | 2022             | Unspecified            | Urban heat island                                                        |
| Weijs-Perrée, M.; Dane, G.; van den Berg, P.                                          | 2020             | Eindhoven, Netherlands | Urban public spaces                                                      |
| Weisz, H.; Steinberger, J.K.                                                          | 2010             | Unspecified            | The D-variables of compact planning                                      |
| White, I.; O'Hare, P.                                                                 | 2014             | Unspecified            | Urban form                                                               |
| Wong, P.P.-Y.; Lai, P.-C.; Low, C.-T.; Chen, S.; Hart, M.                             | 2016             | Hong Kong              | Urban heat island                                                        |
| Woo, Y.-E.; Cho, G.-H.                                                                | 2018             | Seoul, South Korea     | Urban sprawl                                                             |
| Wu, W.; Xue, B.; Song, Y.; Gong, X.; Ma, T.                                           | 2023             | Ningbo, China          | Transport and the built environment, urban sprawl                        |
| Xiong, R.; Zhao, H.; Huang, Y.                                                        | 2024             | Guiyang, China         | Active mobility                                                          |
| Xu, X.; Sun, S.; Liu, W.; García, E.H.; He, L.; Cai, Q.;<br>Xu, S.; Wang, J.; Zhu, J. | 2017             | Beijing, China         | Urban heat island                                                        |
| Xue, X.; Ren, Y.; Cui, S.; Lin, J.; Huang, W.; Zhou, J.                               | 2015             | Xiamen, China          | Transport and the built environment                                      |
| Yan, H.; Wu, F.; Dong, L.                                                             | 2018             | Beijing, China         | Urban heat island                                                        |
| Yang, W.; Cao, X.                                                                     | 2018             | Guangzhou, China       | Urban trips and network design                                           |
| Yang, W.; Li, T.; Cao, X.                                                             | 2015             | China                  | Transport and the built environment, The D-variables of compact planning |
| Yao, X.; Kou, D.; Shao, S.; Li, X.; Wang, W.; Zhang, C.                               | 2018             | China                  | Densification and compactification                                       |
| Yezioro, A.; Capeluto, I.G.; Shaviv, E.                                               | 2006             | Unspecified            | Urban heat island                                                        |

| Authors                                                                   | Publication date | Location of Research | Article topic                                                   |
|---------------------------------------------------------------------------|------------------|----------------------|-----------------------------------------------------------------|
| Yıldırım, H.H.Y.; Gültekin, A.B.; Tanrıvermiş, H.                         | 2017             | Europe               | Urban form                                                      |
| Zahabi, S.A.H.; Miranda-Moreno, L.; Patterson, Z.; Barla, P.; Harding, C. | 2012             | Montreal, Canada     | Vehicle electrification and the built environment, urban sprawl |
| Zamanifard, H.; Alizadeh, T.; Bosman, C.; Coiacetto, E.                   | 2019             | Brisbane, Australia  | Urban public spaces                                             |
| Zhao, P.; Lü, B.; Roo, G. de                                              | 2011             | Beijing              | Urban trips and network design                                  |
| Zheng, S.; Kroll; A.                                                      | 2023             | Wordwide             | Active mobility                                                 |
| Zhu, P.; Wang, K.; Ho, S.-N. (Rita); Tan, X.                              | 2023             | Hong Kong            | Transport and the built environment                             |
| Zölch, T.; Maderspacher, J.; Wamsler, C.; Pauleit, S.                     | 2016             | Munich, Germany      | Urban heat island                                               |
